# Supplementary material for: A survey of proximal methods for monitoring leaf phenology intemperate deciduous forests
Source: Copernicus journal article supplement (doi:10.5194/bg-2020-389), 2020-12-02
Supplement: Supplementary file 1 [file bg-2020-389-supplement.pdf]

*Supplement of*

## **A survey of proximal methods for monitoring leaf phenology in temperate deciduous forests**

**Kamel Soudani<sup>1</sup>, Nicolas Delpierre<sup>1</sup>, Daniel Berveiller<sup>1</sup>, Gabriel Hmimina<sup>2</sup>, Jean-Yves Pontailler<sup>1</sup>, Lou Seureau<sup>1</sup>, Gaëlle Vincent<sup>1</sup>, Éric Dufrêne<sup>1</sup>**

<sup>1</sup> Université Paris-Saclay, CNRS, AgroParisTech, Ecologie Systématique et Evolution, 91405, Orsay, France.

<sup>2</sup> Laboratoire de Météorologie Dynamique, IPSL, CNRS/UPMC, Paris, France.

\* Correspondence to : Kamel Soudani (kamel.soudani@universite-paris-saclay.fr)

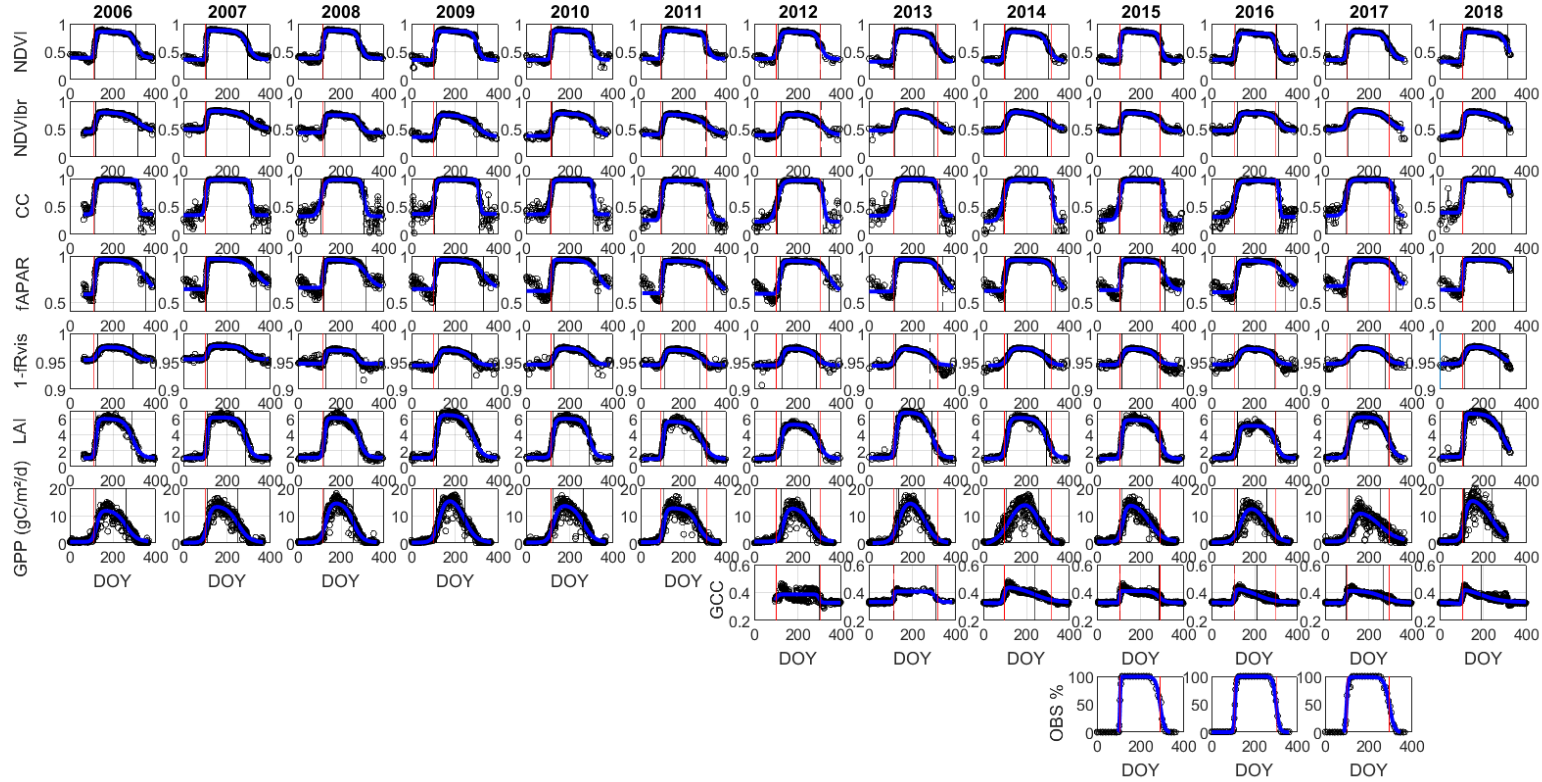

**S1:** Time-series of NDVI (Normalized Difference Vegetation Index), broad-band NDVI (NDVI<sub>br</sub>),  $1-fR_{vis}$  (fraction of reflected radiation),  $fAPAR$  (fraction of absorbed PAR), LAI (Leaf Area Index), CC (Canopy Closure) and GPP (Gross Primary Production) over the period 2006-2018, GCC (Greenness Chromatic Coordinate) over the period 2012-2018 and human-eye observations OBS based on an intensive sampling over 2015-2017. Circle: data; continuous curve (blue): fitted ADS function. Vertical lines: observed phenological dates (red) and predicted dates (black) in spring (BB-OBS over 200-2018) and autumn (LS-OBS 2011-2017).

| Method                                                                                        | Spring budburst |     |     | Autumn leaf senescence and leaf fall |     |     |
|-----------------------------------------------------------------------------------------------|-----------------|-----|-----|--------------------------------------|-----|-----|
|                                                                                               | SOS             | MOS | EOS | SOF                                  | MOF | EOF |
| <b>OBS: 2006-2018</b><br><i>2012-2018 (spring) and 2012-2017 (autumn)</i><br><i>2015-2017</i> | -               | 106 | -   | -                                    | -   | -   |
|                                                                                               | -               | 104 | -   | -                                    | 303 | -   |
|                                                                                               | 97              | 104 | 111 | 272                                  | 295 | 317 |
| <b>NDVI</b>                                                                                   | 100             | 109 | 117 | 269                                  | 301 | 332 |
|                                                                                               | 98              | 108 | 118 | 268                                  | 300 | 332 |
|                                                                                               | 98              | 107 | 115 | 269                                  | 296 | 323 |
| <b>NDVI<sub>br</sub></b>                                                                      | 100             | 114 | 126 | 243                                  | 302 | 360 |
|                                                                                               | 97              | 113 | 127 | 244                                  | 299 | 353 |
|                                                                                               | 96              | 111 | 125 | 254                                  | 298 | 341 |
| <b>GCC</b>                                                                                    | -               | -   | -   | -                                    | -   | -   |
|                                                                                               | 96              | 104 | 110 | 209                                  | 267 | 321 |
|                                                                                               | 98              | 103 | 108 | 199                                  | 254 | 323 |
| <b><math>fR_{vis}</math></b>                                                                  | 101             | 119 | 137 | 237                                  | 281 | 324 |
|                                                                                               | 97              | 118 | 139 | 238                                  | 282 | 325 |
|                                                                                               | 94              | 116 | 139 | 241                                  | 281 | 320 |
| <b><math>fAPAR</math></b>                                                                     | 103             | 111 | 119 | 280                                  | 334 | 375 |
|                                                                                               | 102             | 111 | 120 | 284                                  | 332 | 367 |
|                                                                                               | 101             | 110 | 119 | 278                                  | 327 | 354 |
| <b>CC</b>                                                                                     | 87              | 104 | 120 | 303                                  | 316 | 329 |
|                                                                                               | 83              | 103 | 122 | 304                                  | 318 | 330 |
|                                                                                               | 82              | 102 | 121 | 302                                  | 313 | 323 |
| <b>LAI</b>                                                                                    | 101             | 116 | 129 | 246                                  | 288 | 330 |
|                                                                                               | 100             | 116 | 130 | 251                                  | 291 | 330 |
|                                                                                               | 98              | 115 | 131 | 254                                  | 290 | 327 |
| <b>GPP</b>                                                                                    | 95              | 123 | 152 | 203                                  | 253 | 317 |
|                                                                                               | 96              | 125 | 158 | 204                                  | 251 | 321 |
|                                                                                               | 94              | 123 | 152 | 202                                  | 249 | 326 |

**S2:** Average phenological dates observed and estimated from the different methods and using the six phenological markers (SOS, MOS, EOS, SOF, MOF, EOF). In each cell, the first line corresponds to average dates calculated over the whole period 2006-2018. The second line corresponds to average dates calculated over 2012-2018 in the spring and over 2012-2017 in the autumn (the two periods that are common to all methods in spring and in autumn, respectively). The third line corresponds to average dates calculated over 2015-2017 for which the six phenological metrics are determined from the intensive sampling protocol.

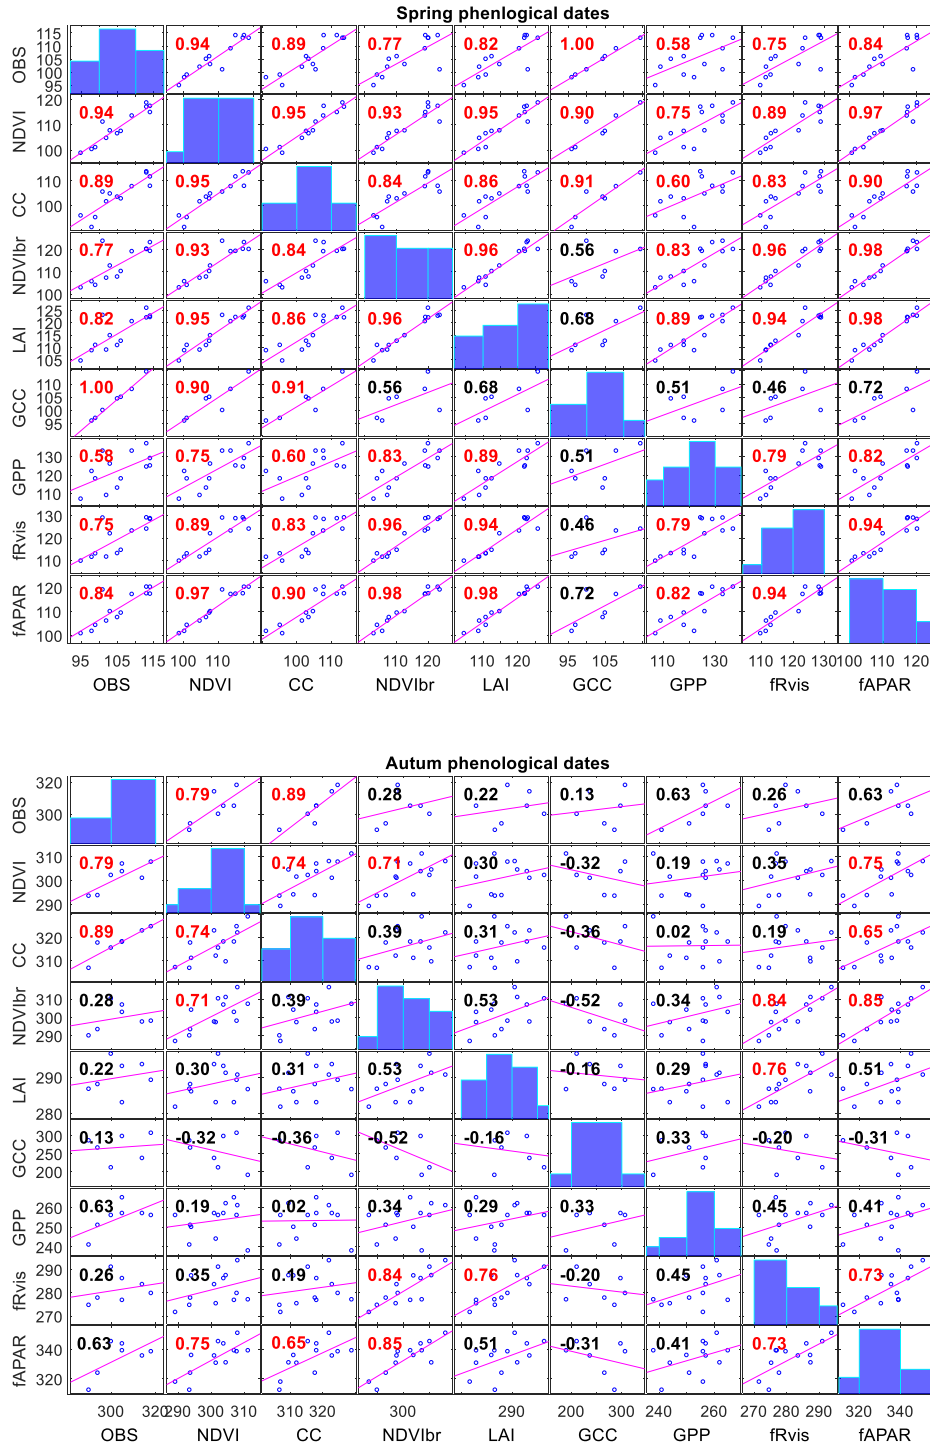

**S3** : Correlation matrix of MOS and MOF between the different methods : Human-eye observations (BB-OBS and LS-OBS), NDVI (Normalized Difference Vegetation Index), GCC (Greenness Chromatic Coordinate), broad-band NDVI (NDVibr),  $fR_{vis}$  (fraction of reflected radiation),  $fAPAR$  (fraction of absorbed PAR), LAI (Leaf Area Index), CC (Canopy Closure) and GPP (Gross Primary Production). Pearson's coefficient of correlation: significant at 5% in red, not significant in black.

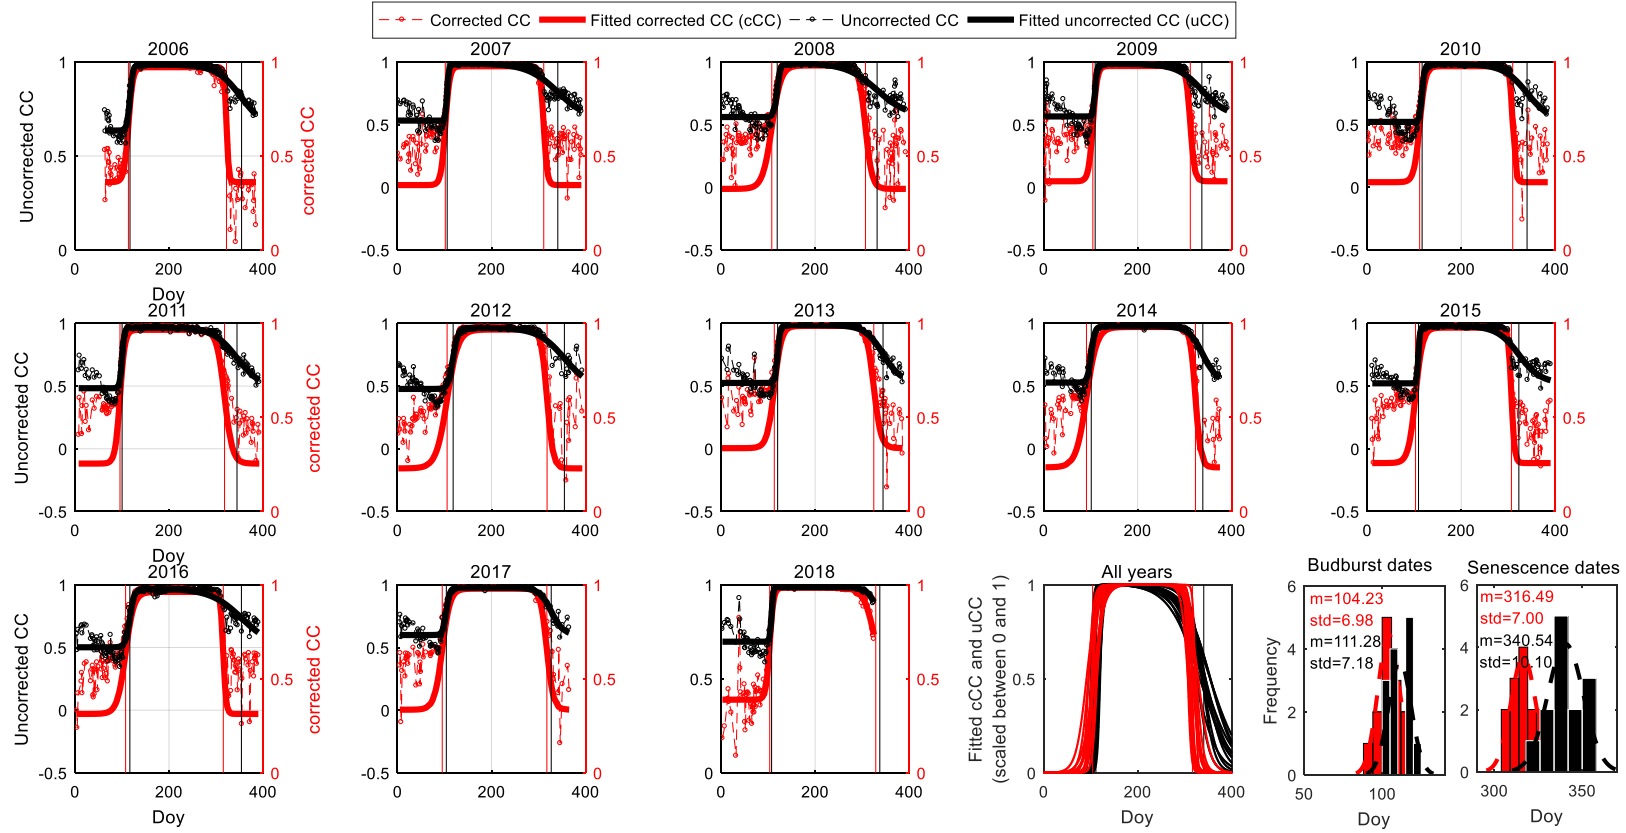

**S4:** Time-series of cosine corrected (red) and uncorrected canopy closure (black) over 2006-2018. Circle: data; continuous curves : fitted time-series using ADS function. Vertical lines: predicted phenological dates from corrected (red) and uncorrected CC (black) in spring and autumn. Penultimate and last subplots are fitted time-series for all years scaled between 0 and 1 and histograms of predicted phenological dates in spring and autumn from cosine corrected (red) and uncorrected CC (black). Mean (m) and standard deviation (std) are superimposed on the histograms.

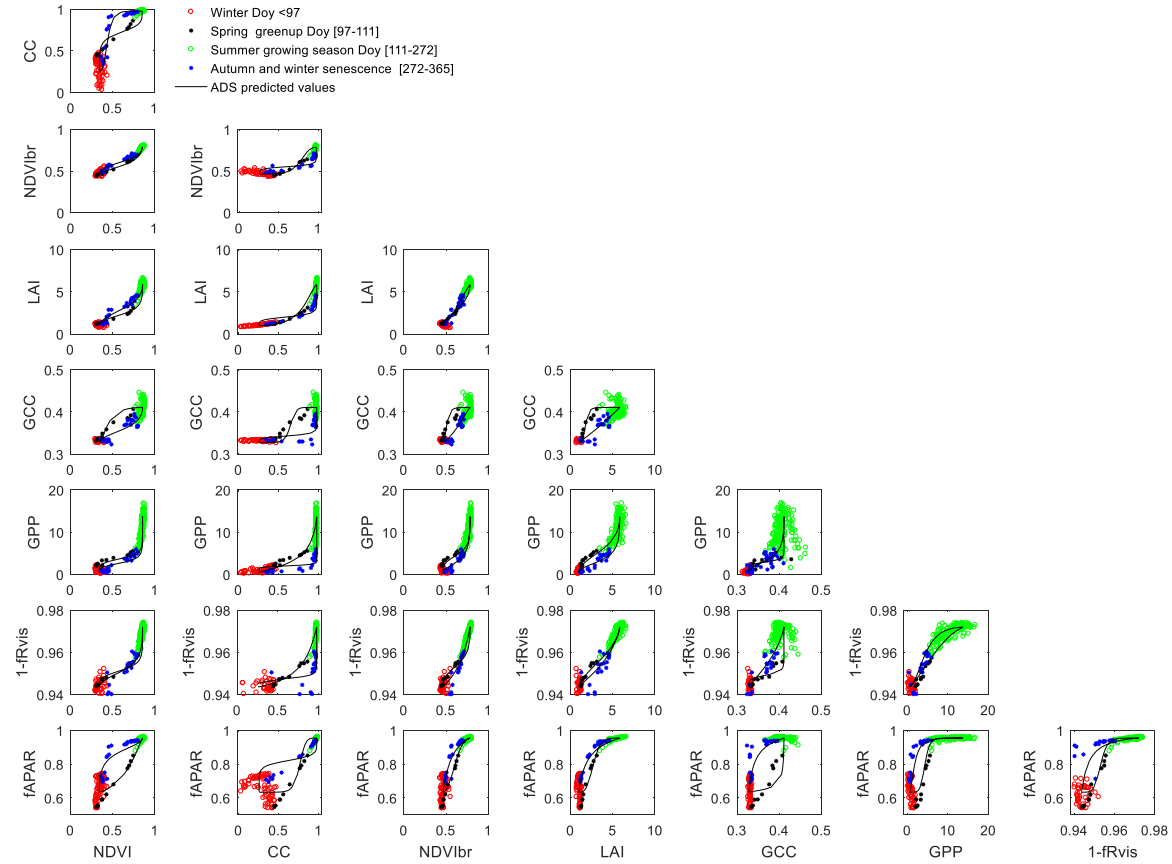

**S5:** Relationships between the different variables during 2015. Four phenological phases are distinguished: the winter phase (red, DoY 1-97), the budburst and leaf expansion phase in spring (black, DoY 97-111), the summer growing season (green, DoY 111-272) and the autumn and winter senescence phase (DoY 272-365). The date ranges are determined by considering the average observed phenological dates during the period 2015-2017 (the *suppl. Table S2*).
